# Supplementary material
Source: PubMed Central journal article supplement (PMC8184359)
Supplement: mmc1.pdf [file mmc1.pdf]

## Supplementary Information

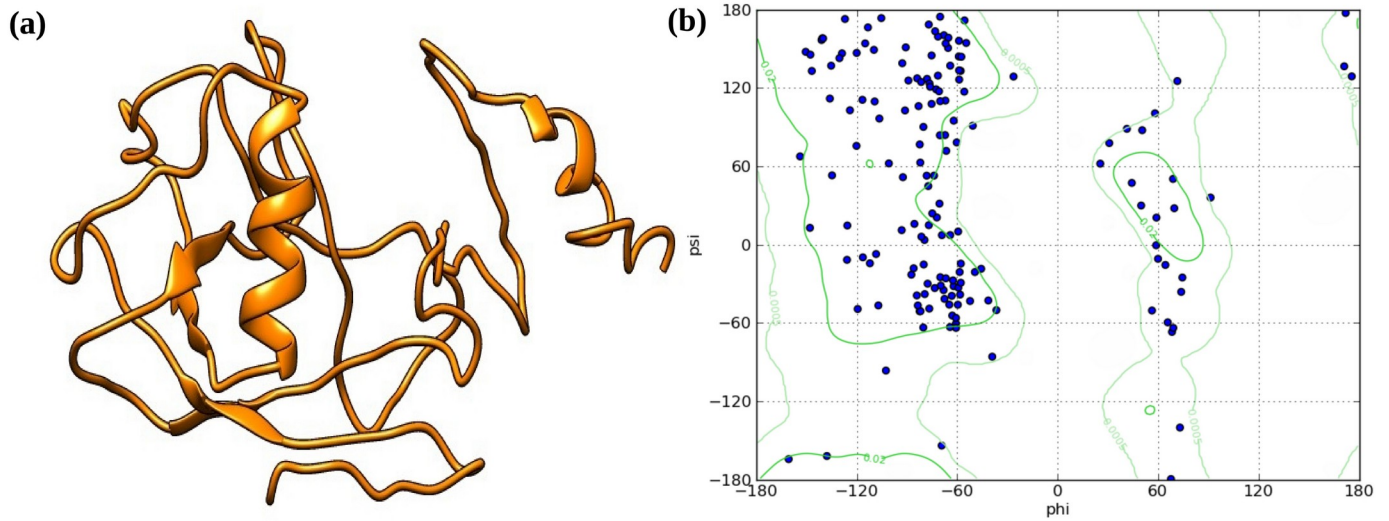

**Figure S1:** (a) 3D structure of modeled SARS-CoV-2 Nsp1. (b) Ramachandran plot generated by Chimera showing the stereochemical quality of the SARS-CoV-2 Nsp1 protein structure.

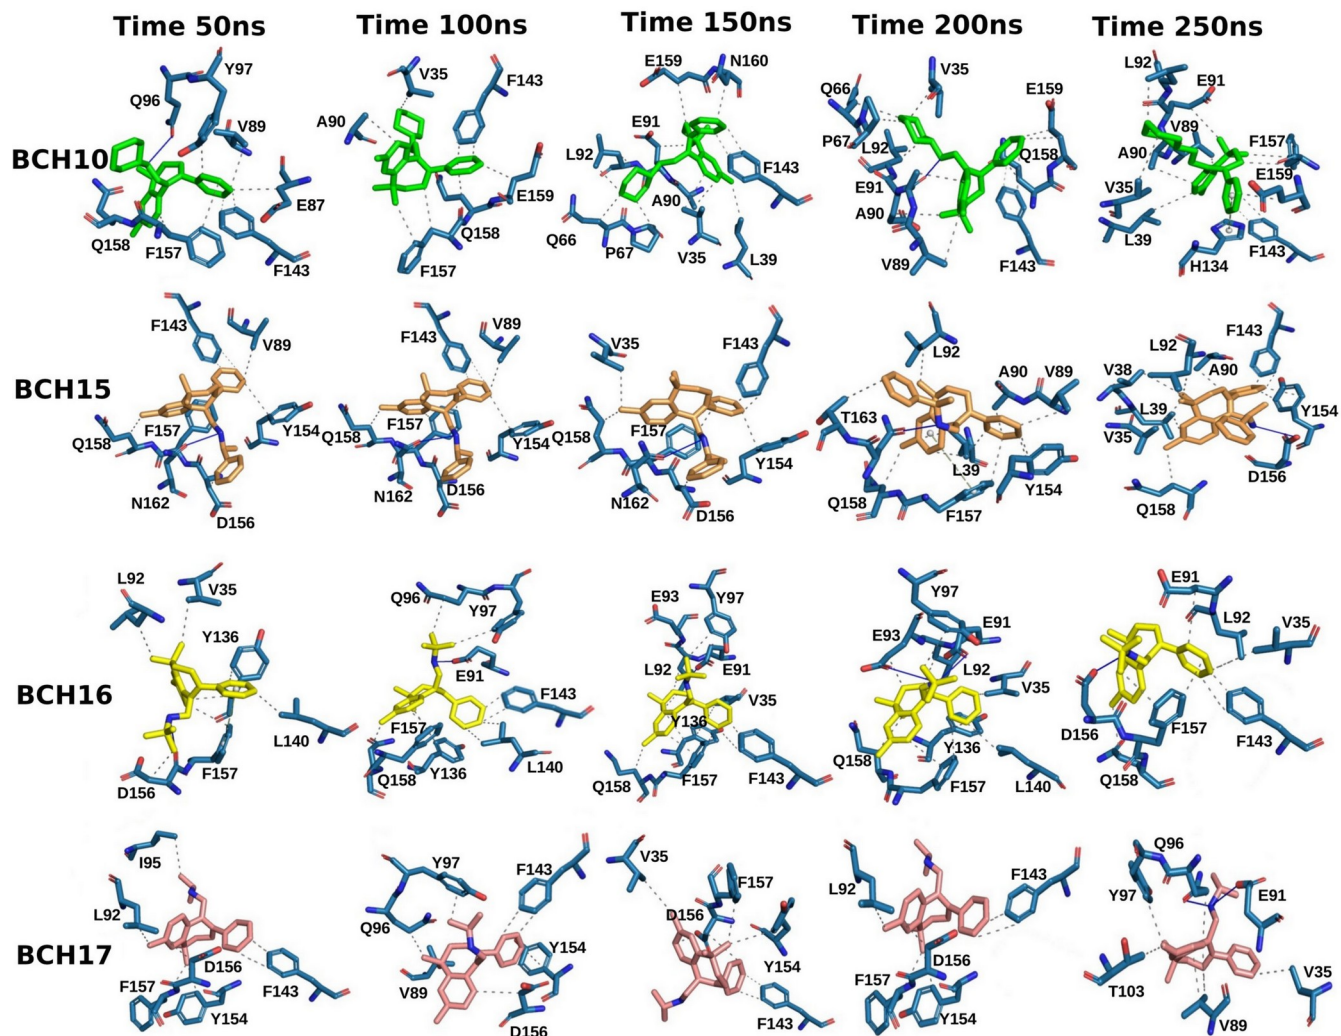

**Figure S2:** Interactions of selected molecules with SARS-CoV-2 Nsp1 complexes during MD-simulations at different time intervals.

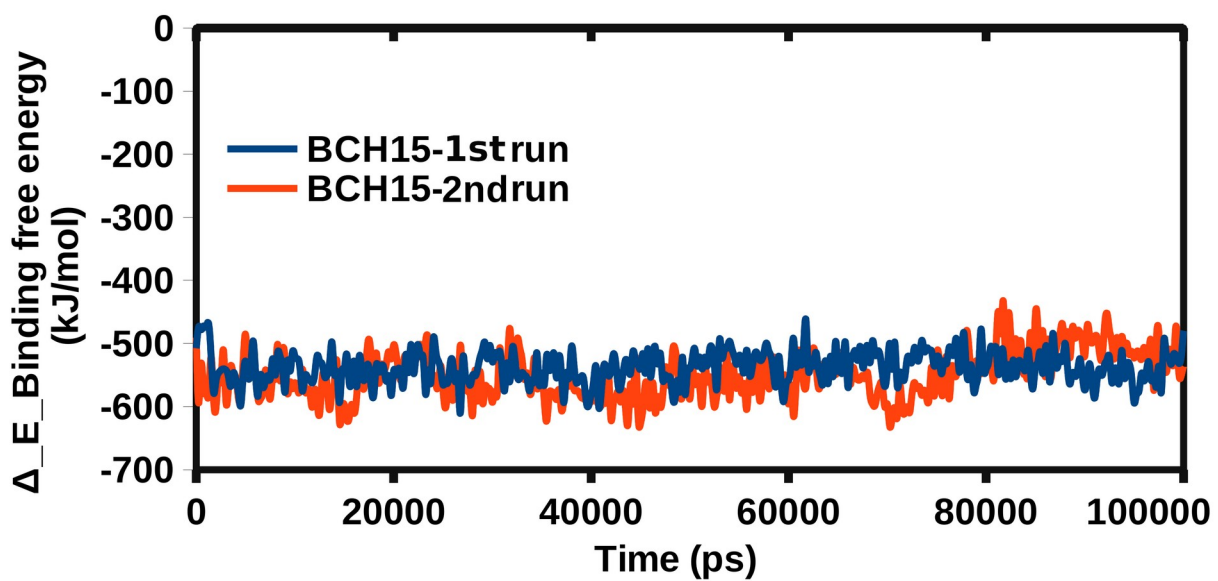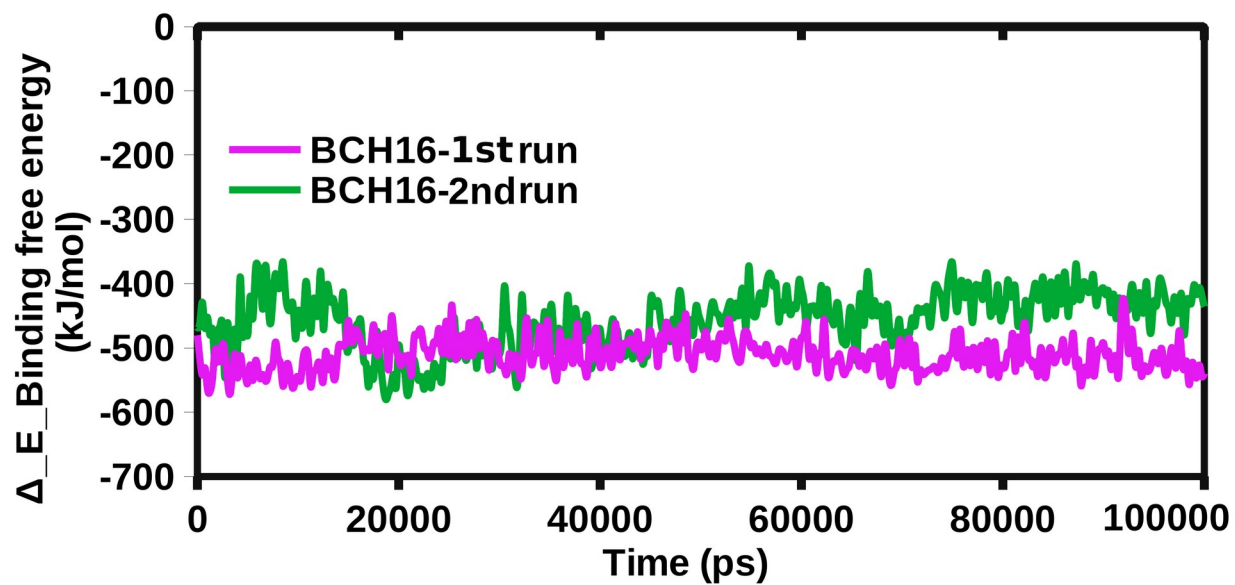

Figure S3: Graphical representation of binding free energy for top two complexes.

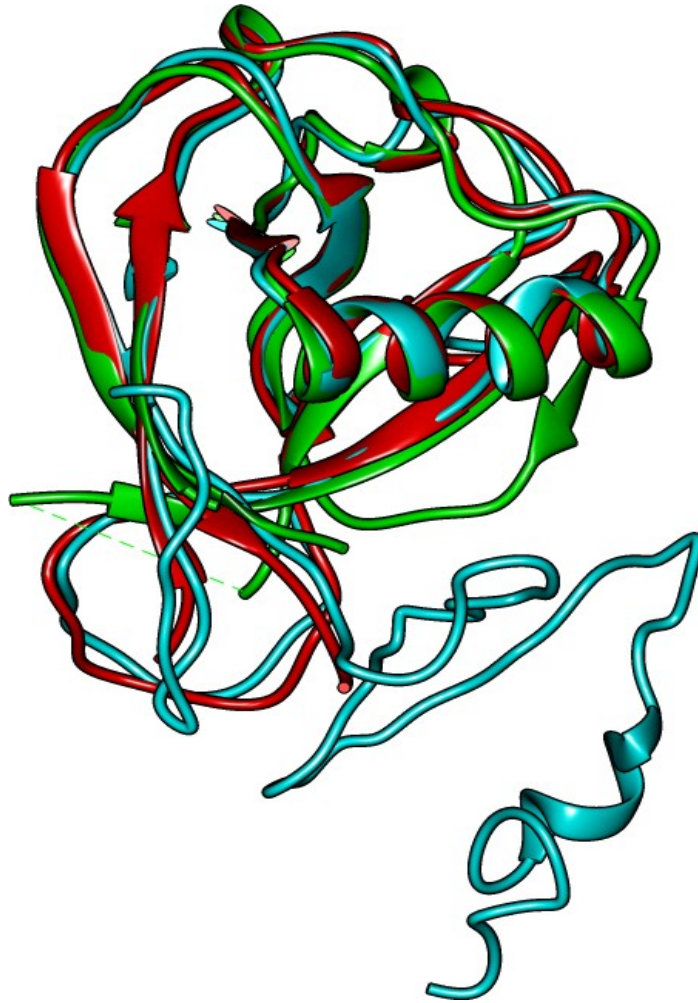

**Figure S4:** Comparison of modeled full length Nsp1 SARS-CoV-2 (cyan) with deposited short-length Nsp1 SARS-CoV-2 (PDBID: 7K3N in green) and Nsp1 SARS-CoV (PDBID: 2GDT in red) by superimposition.

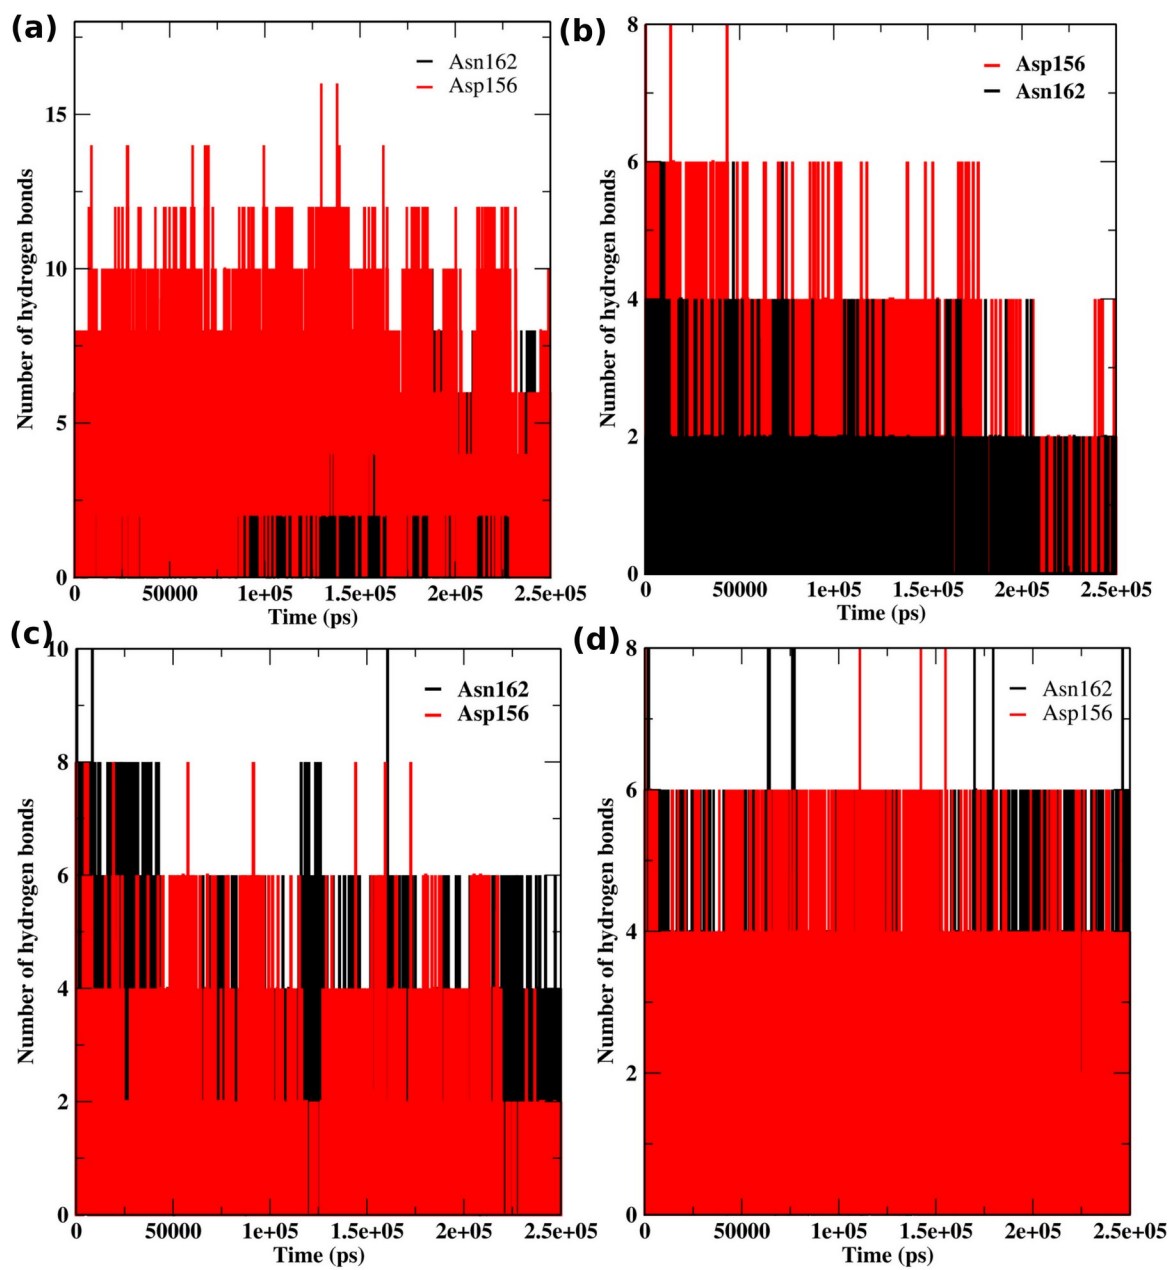

**Figure S5:** The analysis of Hydrogen bonds formed between protein and selected residues Asp156 and Asn162 during the simulation.

**Table S1:** Estimated Affinity, LE and Torsion values for selected seventeen AAB molecules.

| <b>Complexes</b> | <b>Estimated Affinity (Ki)</b> | <b>LE</b> | <b>Torsion</b>                                                                        |
|------------------|--------------------------------|-----------|---------------------------------------------------------------------------------------|
| Nsp1-BCH1        | 12.45mM-125.3μM                | 0.18      |    |
| Nsp1-BCH2        | 86.82mM-873.9μM                | 0.10      |    |
| Nsp1-BCH3        | 2013.5mM-20.26mM               | 0.9       |    |
| Nsp1-BCH4        | 5243.9mM-52.77mM               | 0.7       |    |
| Nsp1-BCH5        | 156mM-1.57mM                   | 0.12      |    |
| Nsp1-BCH6        | 91.9mM-925μM                   | 0.14      |    |
| Nsp1-BCH7        | 11.4mM-115.3μM                 | 0.17      |    |
| Nsp1-BCH8        | 92.64mM-932.4μM                | 0.15      |    |
| Nsp1-BCH9        | 7562mM-76.1mM                  | 0.5       |    |
| Nsp1-BCH10       | 8.81mM-88.67μM                 | 0.26      |    |
| Nsp1-BCH11       | 10.16mM-102.3μM                | 0.19      |    |
| Nsp1-BCH12       | 59.53mM-599μM                  | 0.11      |  |
| Nsp1-BCH13       | 297.8mM-2.9mM                  | 0.14      |  |
| Nsp1-BCH14       | 1307mM-13.15mM                 | 0.10      |  |
| Nsp1-BCH15       | 0.22mM-2.24μM                  | 0.30      |  |
| Nsp1-BCH16       | 0.95mM-9.62μM                  | 0.29      |  |
| Nsp1-BCH17       | 0.90mM-9.07μM                  | 0.30      |  |

# Below 0.20 LE is low

**Table S2:** MM-PBSA binding free energies of top two Nsp1 complexes calculated from the MD simulations performed in two repetition.

| <b>Complexes</b>     | <b>Binding energy<br/>(kJ/mol)</b> | <b>Van der Waal<br/>(kJ/mol)</b> | <b>SASA<br/>(kJ/mol)</b> | <b>Electrostatic<br/>(kJ/mol)</b> | <b>Polar solvation<br/>(kJ/mol)</b> |
|----------------------|------------------------------------|----------------------------------|--------------------------|-----------------------------------|-------------------------------------|
| <b>BCH15-2nd run</b> | -537.468                           | -242.919                         | -21.108                  | -602.055                          | 328.613                             |
| <b>BCH15-3rd run</b> | -549.833                           | -269.398                         | -21.200                  | -577.518                          | 318.283                             |
| <b>BCH16-2nd run</b> | -510.643                           | -223.910                         | -17.119                  | -508.113                          | 238.499                             |
| <b>BCH16-3rd run</b> | -456.137                           | -182.092                         | -16.315                  | -528.934                          | 271.203                             |

**Table S3:** Molecular properties of AAB molecules obtained from molinspiration server.

| <b>Molecules</b> | <b>LogP</b> | <b>MW</b> | <b>HBA</b> | <b>HBD</b> | <b>nRotb</b> | <b>nviolations</b> | <b>TPSA</b> | <b>Bioactivity</b> |
|------------------|-------------|-----------|------------|------------|--------------|--------------------|-------------|--------------------|
| BCH1             | 5.76        | 375.56    | 2          | 0          | 3            | 1                  | 12.47       | 0.25               |
| BCH2             | 5.37        | 391.56    | 3          | 0          | 4            | 1                  | 21.71       | 0.20               |
| BCH3             | 5.21        | 403.57    | 3          | 0          | 4            | 1                  | 29.54       | 0.18               |
| BCH4             | 7.00        | 471.64    | 4          | 1          | 7            | 1                  | 39.73       | 0.12               |
| BCH5             | 4.56        | 388.62    | 1          | 2          | 4            | 0                  | 16.61       | 0.27               |
| BCH6             | 4.17        | 404.62    | 2          | 2          | 5            | 0                  | 25.84       | 0.22               |
| BCH7             | 4.94        | 402.65    | 1          | 2          | 4            | 0                  | 16.61       | 0.24               |
| BCH8             | 5.39        | 443.48    | 1          | 2          | 4            | 1                  | 16.61       | 0.23               |
| BCH9             | 4.01        | 416.63    | 2          | 2          | 5            | 0                  | 33.68       | 0.19               |
| BCH10            | 6.62        | 381.56    | 1          | 1          | 5            | 1                  | 12.03       | 0.27               |
| BCH11            | 7.07        | 395.59    | 1          | 1          | 5            | 1                  | 12.03       | 0.26               |
| BCH12            | 6.31        | 501.67    | 5          | 1          | 9            | 2                  | 48.96       | 0.16               |
| BCH13            | 5.31        | 361.53    | 2          | 0          | 3            | 1                  | 12.47       | 0.26               |
| BCH14            | 6.52        | 423.60    | 2          | 1          | 6            | 1                  | 29.10       | 0.19               |
| BCH15            | 4.16        | 396.60    | 1          | 2          | 5            | 0                  | 16.61       | 0.15               |
| BCH16            | 3.39        | 348.55    | 1          | 2          | 4            | 0                  | 16.61       | 0.19               |
| BCH17            | 2.94        | 334.53    | 1          | 2          | 4            | 0                  | 16.61       | 0.24               |
